# Supplementary material for: Intratumoral administration of CD1c (BDCA-1)+ and CD141 (BDCA-3)+ myeloid dendritic cells in combination with talimogene laherparepvec in immune checkpoint blockade refractory advanced melanoma patients: a phase I clinical trial
Source: PubMed Central journal article supplement — J Immunother Cancer. 2022 Sep 16;10(9):e005141. doi: 10.1136/jitc-2022-005141 (PMC9486335; doi:10.1136/jitc-2022-005141), 2022-09-16
Supplement: jitc-2022-005141supp002.pdf [file jitc-2022-005141supp002.pdf]

### Supplementary information

**Additional file 1: Figure S1.** Gating strategy and example of flow cytometric analysis of purified CD1c (BDCA-1)<sup>+</sup> / CD141 (BDCA-3)<sup>+</sup> myDCs. The gating strategy is explained in the materials and methods section.

Abbreviations: 7-AAD: 7-Aminoactinomycin D; CD: cluster of differentiation; FSC: forward scatter; SCC: sideward scatter

**Additional file 2: Table S1.** Leukapheresis purified cell fractions after volume reduction.

**Additional file 3: Table S2.** Number of injections, type of injected lesions, response in injected lesions, and overall response per study patient.

**Additional file 4: Figure S2. A** Plot of eosinophil counts in the blood throughout the time of study treatment. This patient with stage IV-M1a melanoma who achieved a complete remission upon study treatment developed an asymptomatic grade 3 blood eosinophilia. **B** Hematoxylin eosin staining of a biopsy taken at the location where the tumor initially located of the same patient showed infiltrating eosinophils. The white circles highlight eosinophils present in the tissue section. **C** Photograph of a purpuric rash developing two days after injection of the CD1c (BDCA-1)<sup>+</sup> myDCs that resolved completely after approximately 7 days without any therapeutic intervention in a stage IIIC melanoma patient who obtained a complete remission of metastatic in-transit lesions.
