# Supplementary material for: Intratumoral administration of CD1c (BDCA-1)+ and CD141 (BDCA-3)+ myeloid dendritic cells in combination with talimogene laherparepvec in immune checkpoint blockade refractory advanced melanoma patients: a phase I clinical trial
Source: PubMed Central journal article supplement — J Immunother Cancer. 2022 Sep 16;10(9):e005141. doi: 10.1136/jitc-2022-005141 (PMC9486335; doi:10.1136/jitc-2022-005141), 2022-09-16
Supplement: jitc-2022-005141supp004.pdf [file jitc-2022-005141supp004.pdf]

**Table S2.** Clinical outcome

| Study patient | Study cohort | Number of injections (a) | Type of injected lesion (b) | Response in injected lesion(s) | Overall response |
|---------------|--------------|--------------------------|-----------------------------|--------------------------------|------------------|
| myDCTV-01     | C1           | 6                        | SC                          | PD                             | PD               |
| myDCTV-02     | C1           | 3                        | SC                          | SD                             | PD               |
| myDCTV-03     | C2           | 7                        | SC, LN                      | PD                             | PD               |
| myDCTV-04     | C2           | 8                        | ST                          | SD                             | PD               |
| myDCTV-05     | C3           | 7                        | SC                          | CR                             | CR               |
| myDCTV-06     | C3           | 4                        | SC                          | PR                             | PD               |
| myDCTV-07     | C3           | 6                        | SC                          | CR                             | CR               |
| myDCTV-08     | C4           | 5                        | LN                          | PD                             | PD (MR)          |
| myDCTV-09     | C4           | 6                        | SC                          | PD                             | PD               |
| myDCTV-10     | C4           | 11                       | SC                          | PR                             | PR               |
| myDCTV-11     | C4           | 8                        | LN                          | PR                             | PD               |
| myDCTV-12     | C4           | 10                       | C, LN                       | CR                             | PD (MR)          |
| myDCTV-13     | C4           | 6                        | LN                          | PD                             | PD               |

a Number of injections with talimogene laherparepvec; b Type of injected lesions that were measurable on PET/CT-imaging

according to iRECIST criteria. Abbreviations: C cutaneous; SC subcutaneous; LN lymph nodes; ST soft tissue; PD progressive disease;

SD stable disease; CR complete response; PR partial response; MR mixed response
