# Supplementary figures and images for: Intratumoral administration of CD1c (BDCA-1)+ and CD141 (BDCA-3)+ myeloid dendritic cells in combination with talimogene laherparepvec in immune checkpoint blockade refractory advanced melanoma patients: a phase I clinical trial
Source: PubMed Central journal article supplement — J Immunother Cancer. 2022 Sep 16;10(9):e005141. doi: 10.1136/jitc-2022-005141 (PMC9486335; doi:10.1136/jitc-2022-005141), 2022-09-16

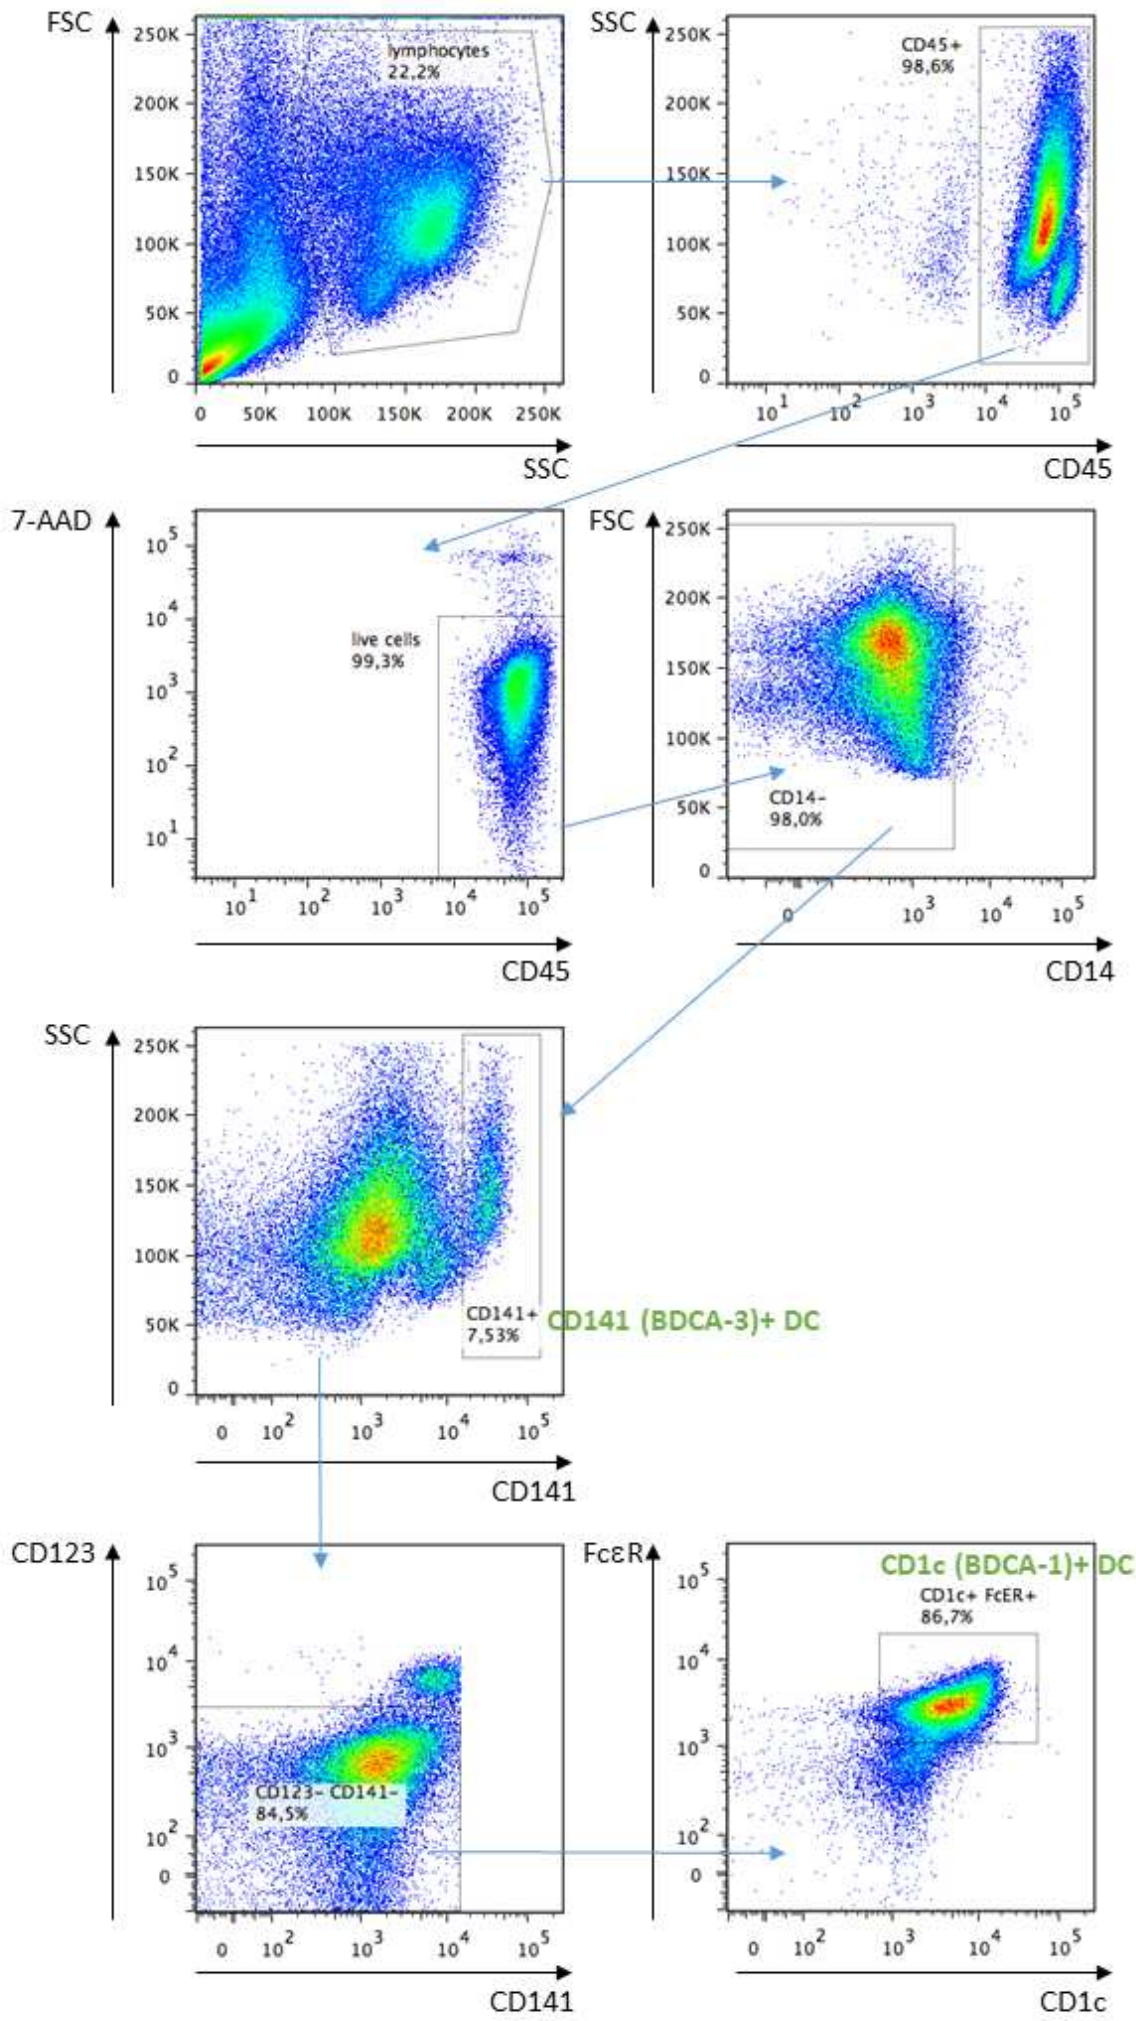

Supplement: jitc-2022-005141supp001.pdf [file jitc-2022-005141supp001.pdf]

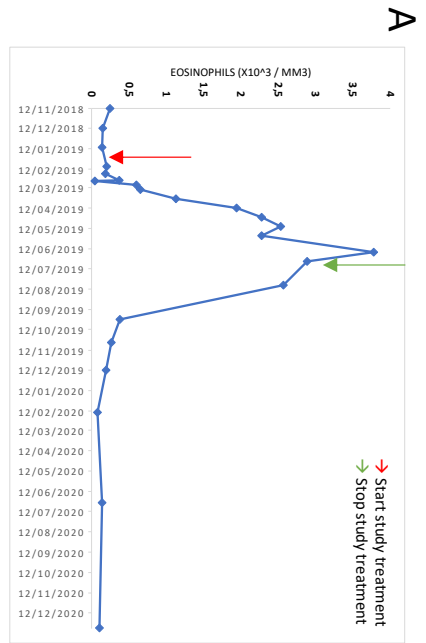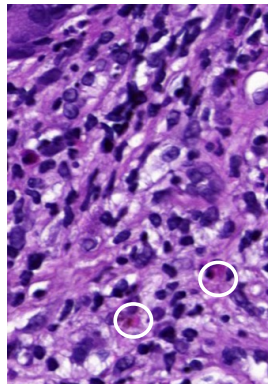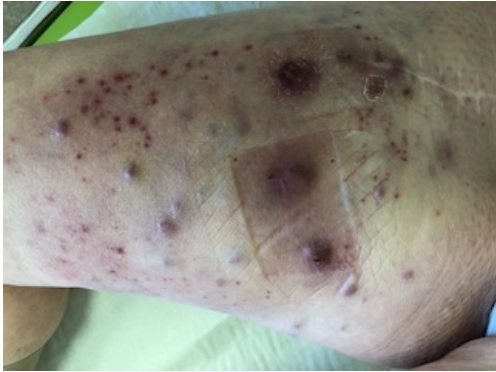

Supplement: jitc-2022-005141supp005.pdf [file jitc-2022-005141supp005.pdf]
